# Supplementary material for: F-Box Protein FBX92 Affects Leaf Size in Arabidopsis thaliana
Source: PubMed Central journal article supplement — Plant Cell Physiol. 2017 Mar 13;58(5):962–75. doi: 10.1093/pcp/pcx035 (PMC5429023; doi:10.1093/pcp/pcx035), 2017-03-13
Supplement: pcx035_Supp.pdf [file pcx035_Supp.pdf]

## SUPPLEMENTARY DATA

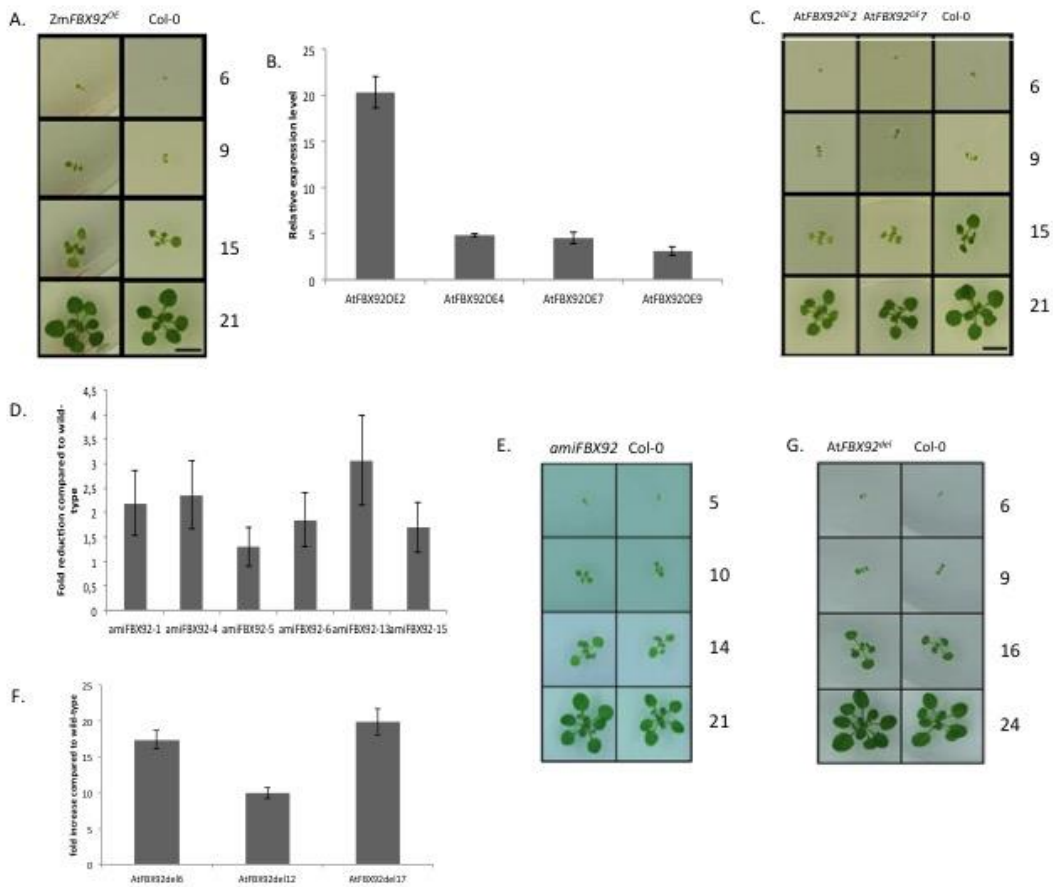

**Supplementary Fig. S1.** Representative pictures of ZmFBX92<sup>OE</sup>, AtFBX92<sup>OE</sup>, amiFBX92, AtFBX92<sup>del</sup> and Col-0 grown *in vitro* and expression levels in mature leaves. (A) Pictures of ZmFBX92<sup>OE</sup> and Col-0 plants grown *in vitro* at 6, 9, 15 and 21 DAS. Scale bar 1 cm. (B) qRT-PCR analysis of the AtFBX92 expression in mature leaves of four AtFBX92<sup>OE</sup> lines relative to wild type. (C) Pictures of AtFBX92<sup>OE</sup> and Col-0 plants grown *in vitro* at 6, 9, 15 and 21 DAS. Scale bar 1 cm. (D) qRT-PCR analysis of the AtFBX92 expression in mature leaves of six amiFBX92 lines relative to wild type. (E) Pictures of amiFBX92 and Col-0 plants grown *in vitro* at 5, 10, 14 and 21 DAS. Scale bar 1 cm. (F) qRT-PCR analysis of the AtFBX92 expression in mature leaves of three AtFBX92<sup>del</sup> lines relative to wild type. (G) Pictures of AtFBX92<sup>del</sup> and Col-0 plants grown *in vitro* at 6, 9, 16 and 24 DAS. Scale bar 1cm.

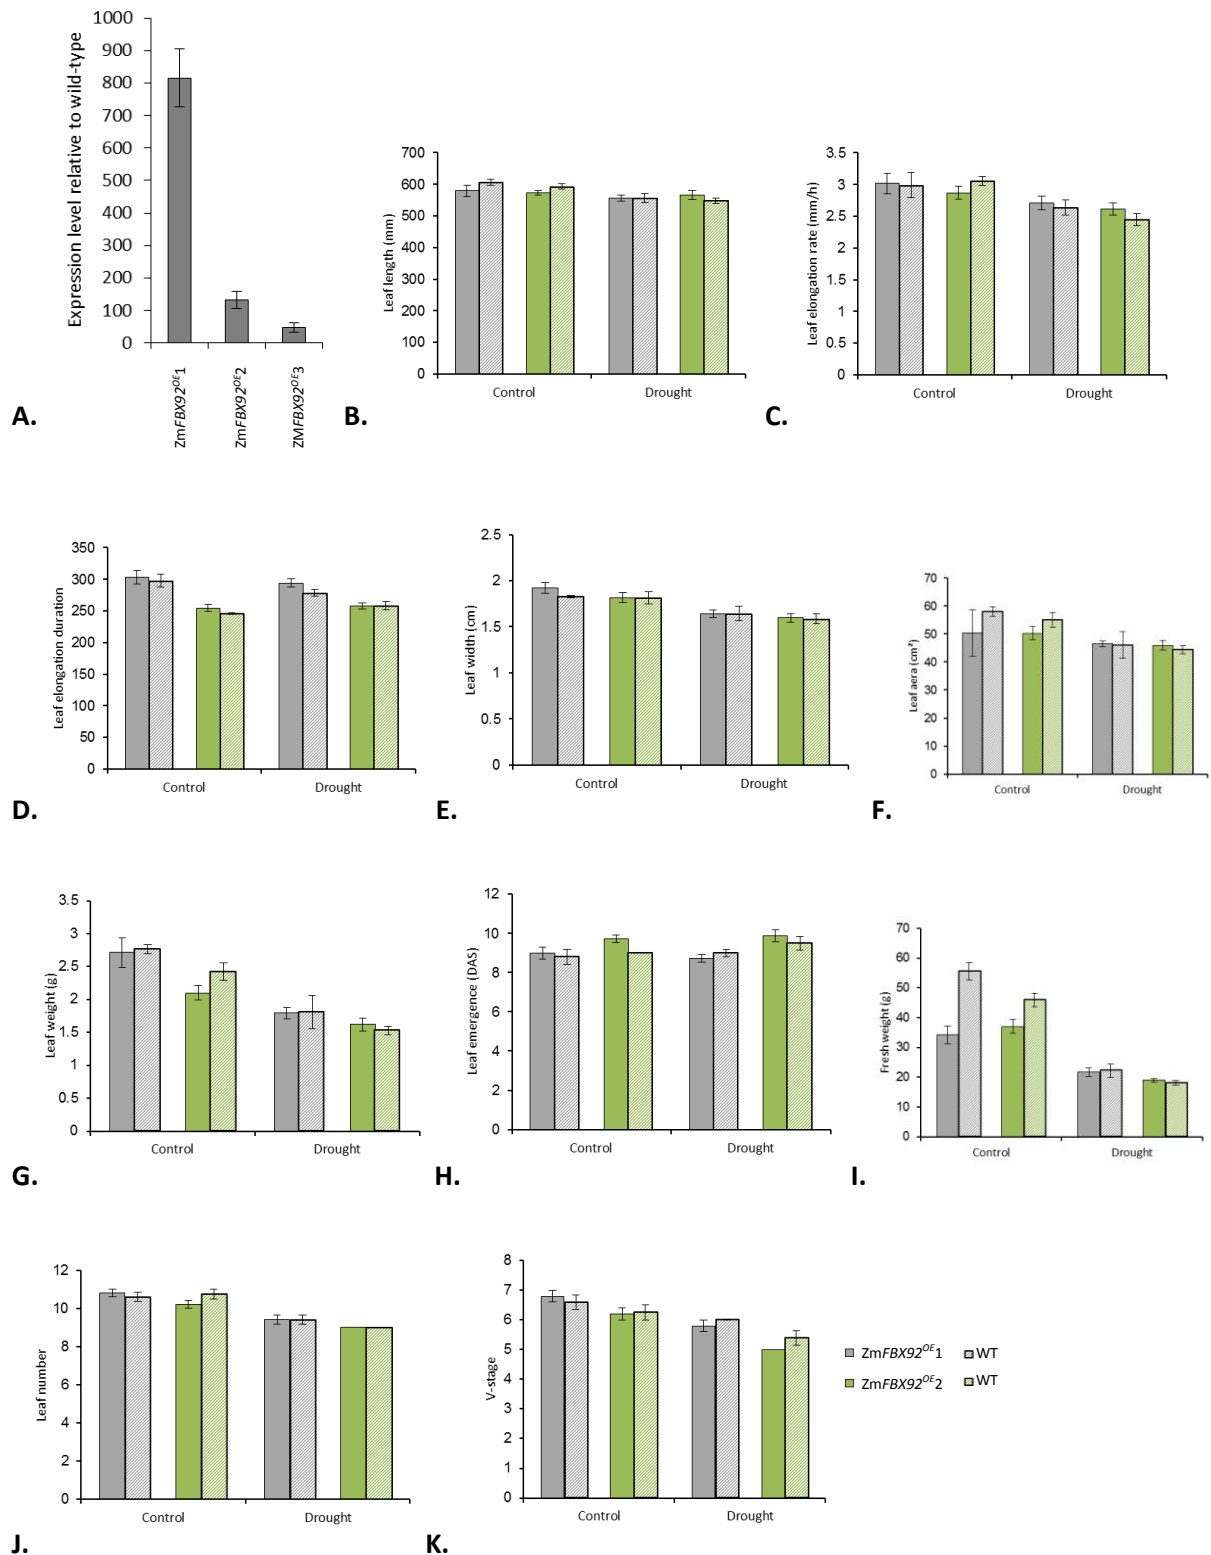

**Supplementary Fig. S2.** Effect of *ZmFBX92* overexpression on maize leaf size and shoot weight under control and mild drought conditions. (A) Expression level of *ZmFBX92* in mature leaves of *ZmFBX92*<sup>OE</sup> plants relative to wild type as determined by qRT-PCR. Values were normalized against expression levels of housekeeping genes. Data are average fold change (transgenic versus wild-type plants) ± SE ( $n_{\text{transgenic}} = 3$  and  $n_{\text{wild-type}} = 9-20$ ). (B to H) Measurement of final leaf 4-related parameters: length (B), elongation rate (C), elongation duration (D), width (E), area (F), weight (G), and emergence

(H). Data are average  $\pm$  SE ( $n_{\text{transgenic}} = 20$  and  $n_{\text{wild-type}} = 20$ . (I to K) Measurement of shoot-related parameters at seedling stage: fresh weight (I), leaf number (J) and V-stage (K). Data are average  $\pm$  SE ( $n_{\text{transgenic}} = 20$  and  $n_{\text{wild-type}} = 20$ ).

A.

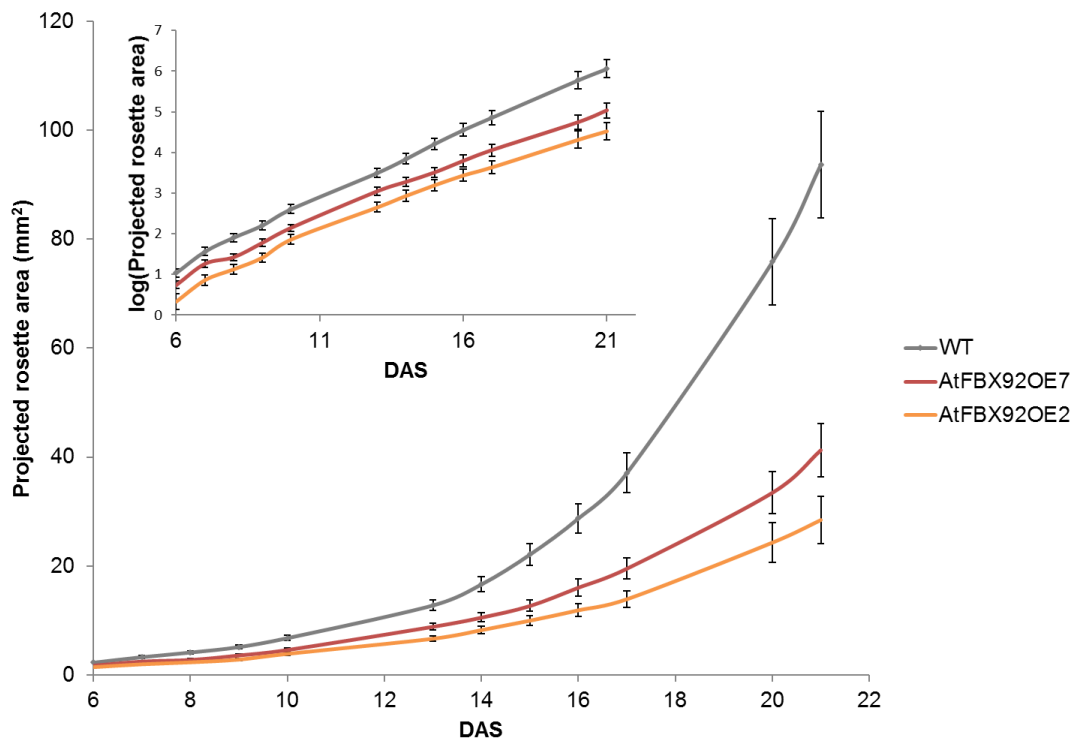

B.

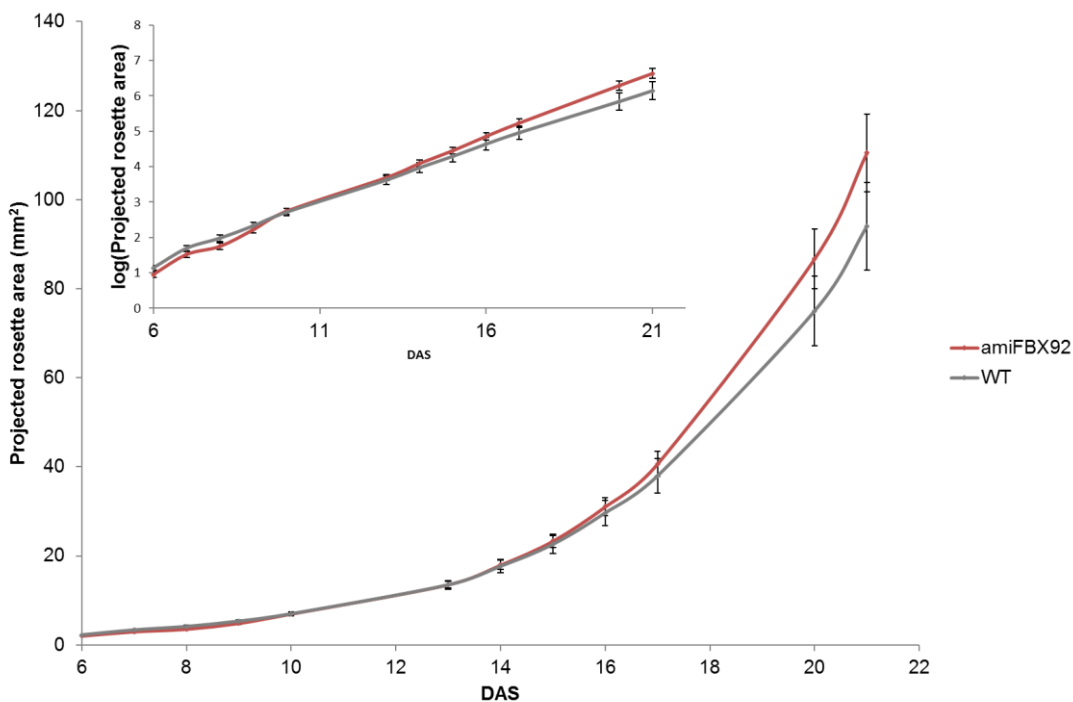

**Supplementary Fig. S3.** Effect of perturbed *AtFBX92* expression on rosette growth under mild osmotic stress conditions. (A) PRA of *AtFBX92*<sup>OE</sup> lines and WT over time from 6 until 21 DAS. Plants were grown *in vitro* on medium containing 25 mM mannitol. Inset: PRA in log scale. Values represent the mean  $\pm$  SE ( $n_{\text{transgenic lines}} = 26-32$ ,  $n_{\text{WT}} = 40$ ). (B) PRA of *amiFBX92* and WT over time from 6 until 21 DAS. Plants were grown *in vitro* on medium containing 25 mM mannitol. Inset: PRA in log scale. Values represent the mean  $\pm$  SE ( $n = 29$ ).

```

                                10      20      30
ZmFBX92  -----MAEAAGGGPLLPEELVIWEILTRLPAKPLLRCR
                                ::  ::::  ::  ::  ::::  .  :
AtFBX92  MASEKSFKKRKITDDVDGVGVGGGLESLPED-IIADIFSRLPISSIARLM
                                10      20      30      40

                                40      50      60      70      80
ZmFBX92  AVCLSWRRRLTSDAKFLLAHRRRQPSLPLLTQGDRSTEDRRIDALDYRTG
                                ::  :::  ::  .  ::  ::  ::  :  .  ::
AtFBX92  FVCRSWRSVLTQHGR--LSSSSSPTKPCLLHCDSPINRGLHFLDLSEE
                                50      60      70      80      90

                                90      100     110     120
ZmFBX92  E-RLPVARTTGRTAANADDLNVLASCDGLLVL---IANGGLHICNPATRQ
                                :  .  .  :  :  :  .  .  .  :  :  :  :  :  :  :  :
AtFBX92  EKRIKTKKFTLRFASSMPEFDVVGSCNGLLCLSDSLYNDSLYLYNPFTTN
                                100     110     120     130     140

                                130     140     150     160     170
ZmFBX92  RAPLA----LLHGASCISALYPYRPSGSYRVAGALLRESRGRPRRVPRA
                                :  :  :  .  .  .  ::  .  :  :  .  :
AtFBX92  SLELPECSNKYHDQELVFGFGFHEMTKEYKVLKIVYFRGSSSNNGIYRG
                                150     160     170     180     190

                                180     190     200     210     220
ZmFBX92  HRRV----ARAQVRRRTSRAVGRRRGDGDADDVVLSPARRGRQDLLAA
                                :  .  .  :  .  .  :  :  :  :  :  :  :
AtFBX92  RGRIQYKQSEVQILTLSSKTT-----DQSLSWRSLGK----AP
                                200     210                               220     230

                                230     240     250
ZmFBX92  GKAARRQREGQQHARVRYSDRVLPATAVAPARGGPLP*-----
                                :  :  :  .  .  .  :  :  :
AtFBX92  YKFVKRSSEALVNGLHFVTE-----PRRHVPDRKFVSFDLEDEEFK
                                240     250                               260     270

ZmFBX92  -----
AtFBX92  RIPKPCDGLNRTNHRLVNLKGCLCAVVYGNYGKLDIWVMKTYGVKESWC
                                280     290     300     310     320

ZmFBX92  -----
AtFBX92  KEYSIGTYLPKGLKQNLDRPMWIWKNAENGKVVRVLCLLENGEILLEYKS
                                330     340     350     360     370

ZmFBX92  -----
AtFBX92  RVLVAYDPKLGKFKDLLFHGLPNWFHTVVHAGTLSWFDTPLDLW*
                                380     390     400     410

```

**Supplementary Fig. S4.** Amino acid alignment of the *ZmFBX92* and *AtFBX92* proteins using EMBOSS Needle. Protein domains were determined using the Pfam database (Finn et al., 2014). The F-box

domains are indicated in yellow, the F-box associated domain of *AtFBX92* in red. Identical amino acids are indicated by “:”, similar amino acids by “.”.

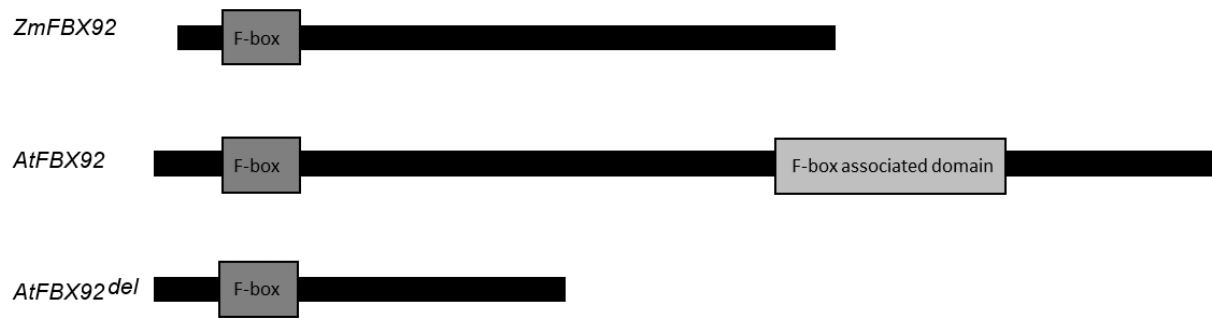

**Supplementary Fig. S5.** Amino acid sequence comparison of the ZmFBX92 and AtFBX92 proteins. Schematic representation of the protein domains in ZmFBX92, AtFBX92 and AtFBX92<sup>del</sup> drawn to scale.

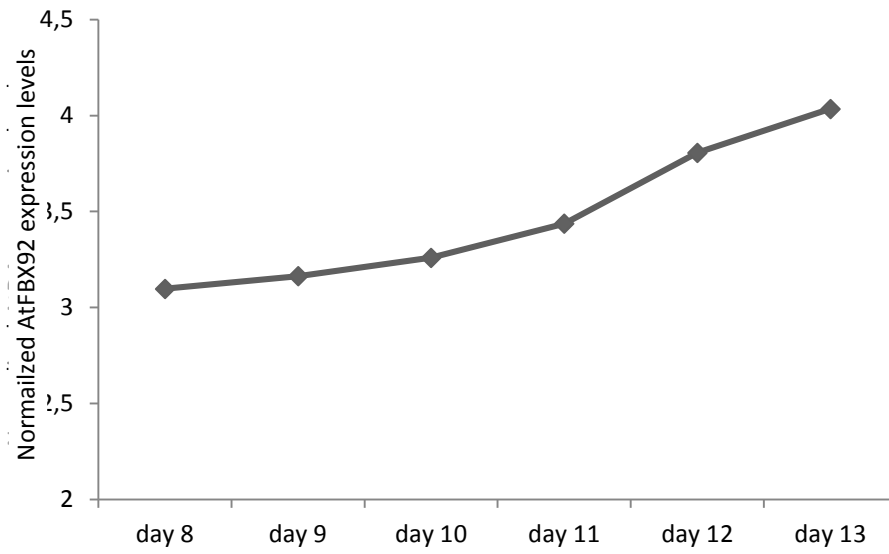

**Supplementary Fig. S6.** *AtFBX92* expression levels in leaf 3 during the subsequent phases of leaf development. Normalized expression levels as calculated from AGRONOMICS1 tiling arrays by Andriankaja et al. (2012).



**A.**

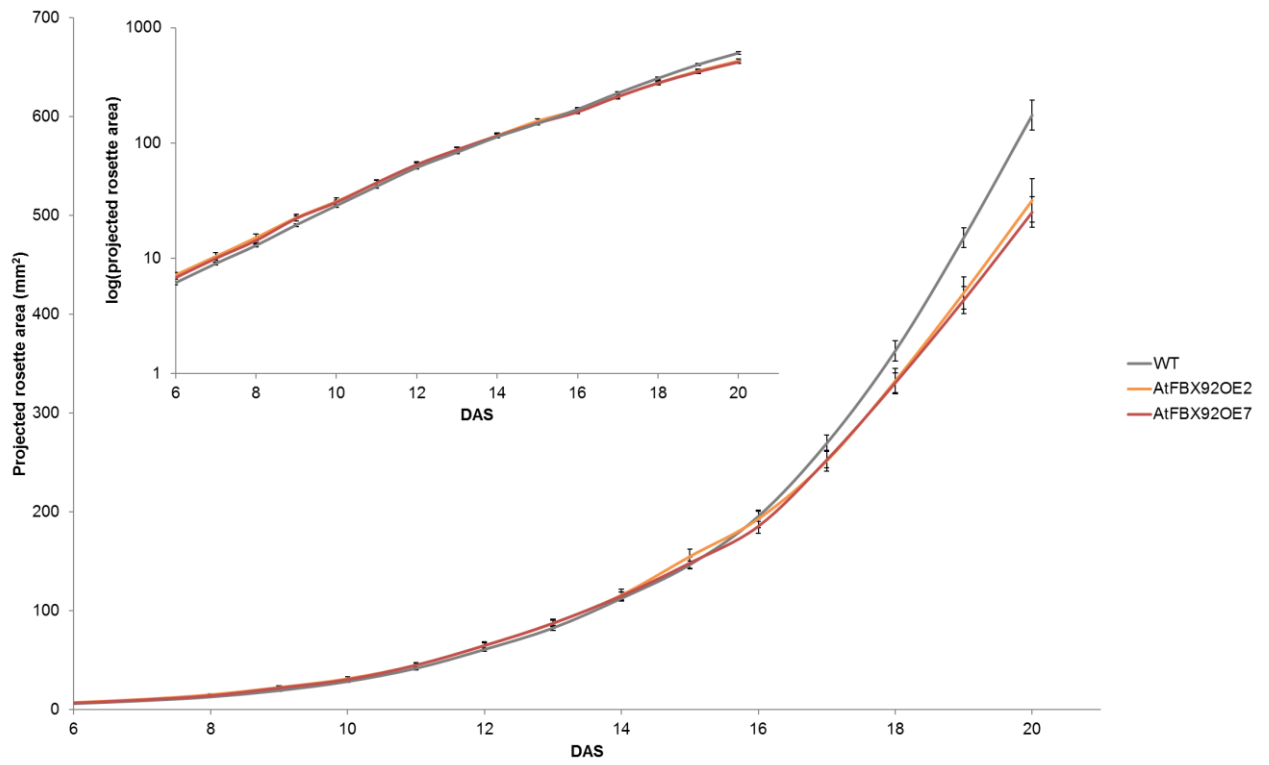

**B.**

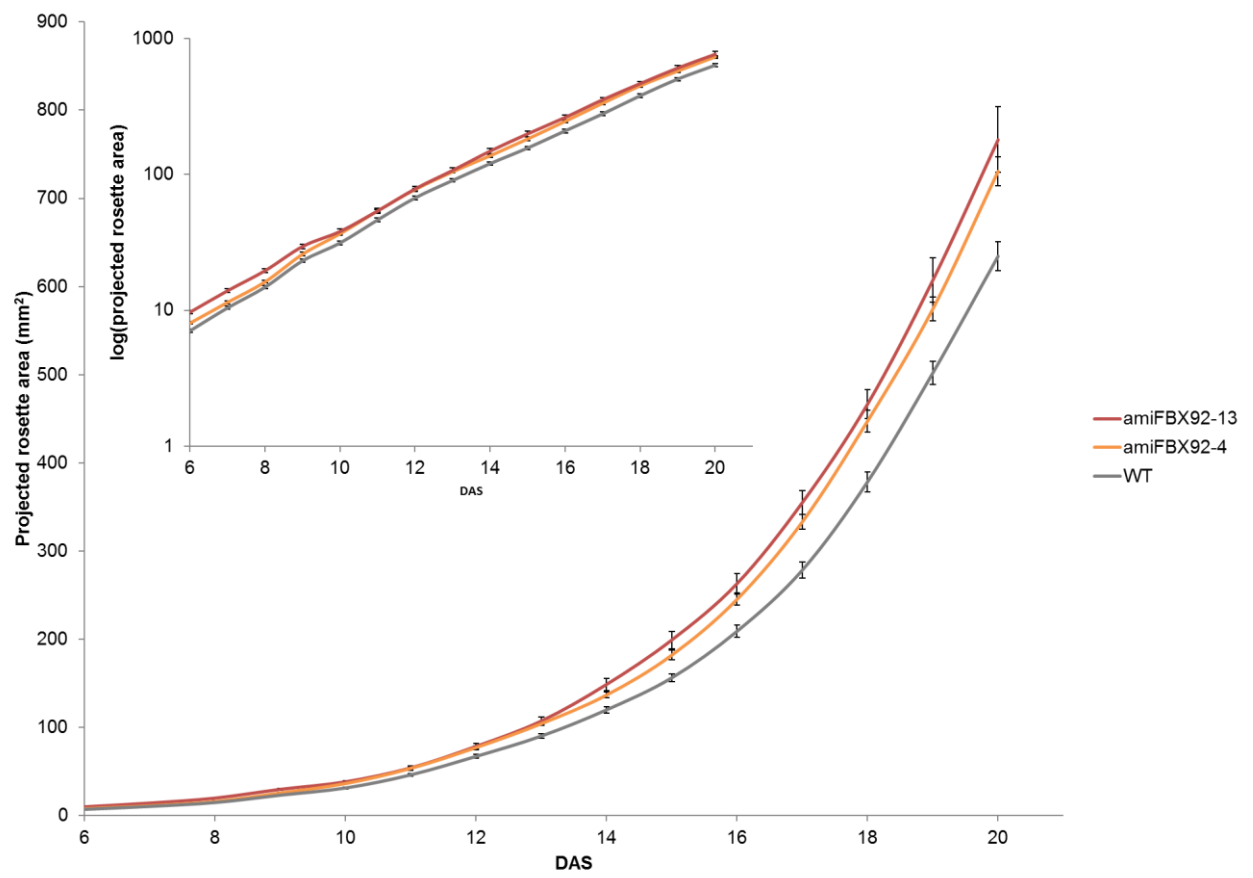

C.

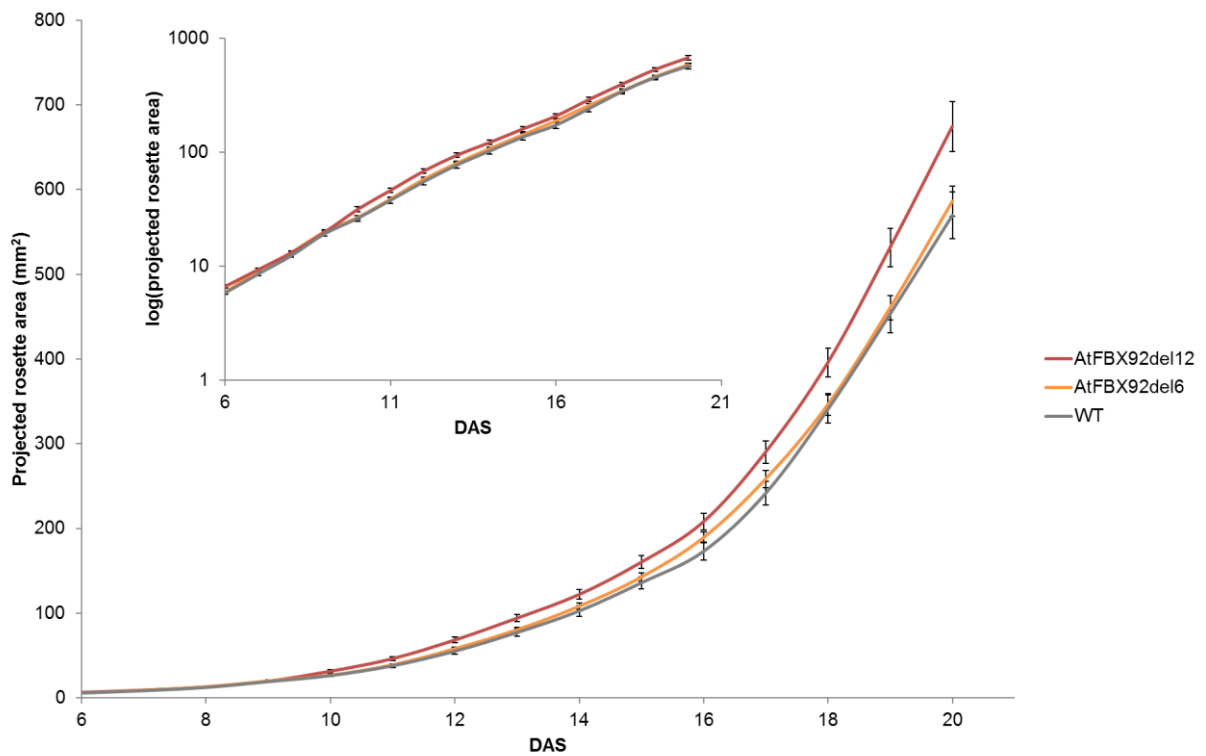

**Supplementary Fig. S7.** Effect of *AtFBX92* perturbation on rosette growth under standard conditions in soil. (A) PRA of *AtFBX92<sup>OE</sup>* and WT plants grown in soil from 6 until 20 DAS. Plants were grown in standard. Inset: PRA in log scale. Values represent the mean  $\pm$  SE (n = 16). (B) PRA of *amiFBX92* and WT plants grown in soil from 6 until 20 DAS. Plants were grown in standard conditions. Inset: PRA in log scale. Values represent the mean  $\pm$  SE (n = 16). (C) PRA of *AtFBX92<sup>del</sup>* and WT plants grown in soil from 6 until 20 DAS. Plants were grown in standard conditions. Inset: PRA in log scale. Values represent the mean  $\pm$  SE (n = 16).

**A.**

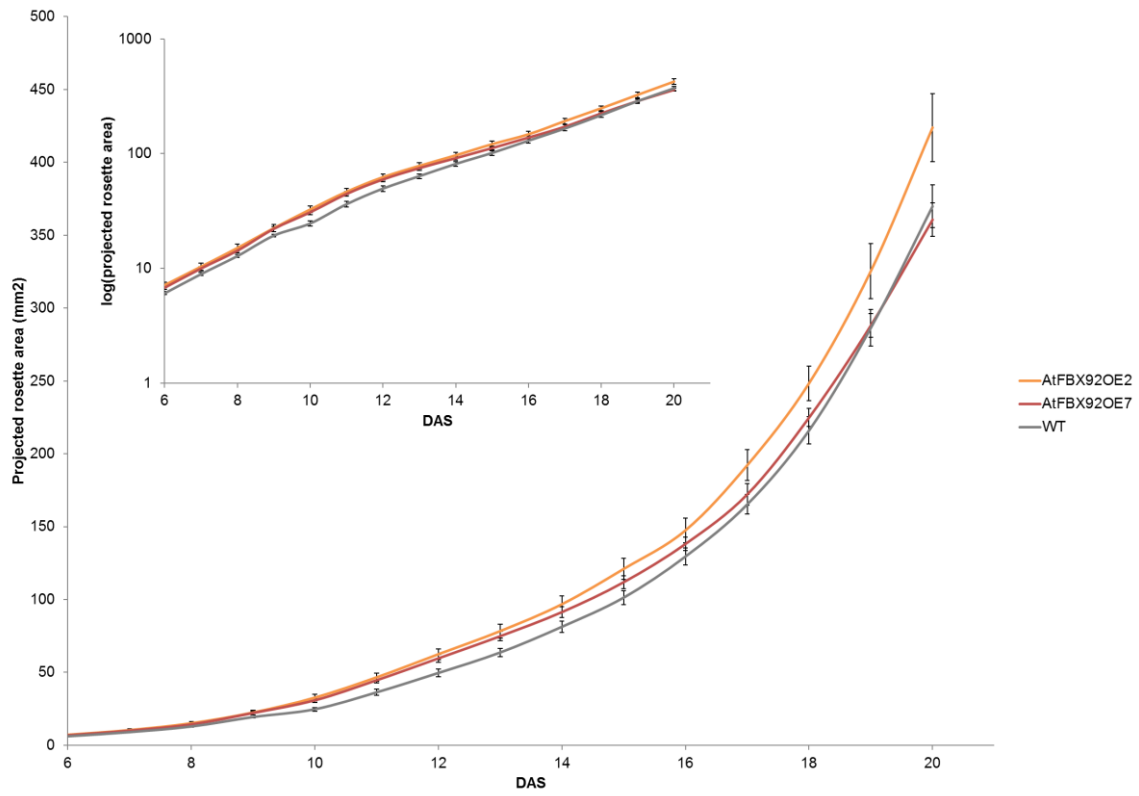

**B.**

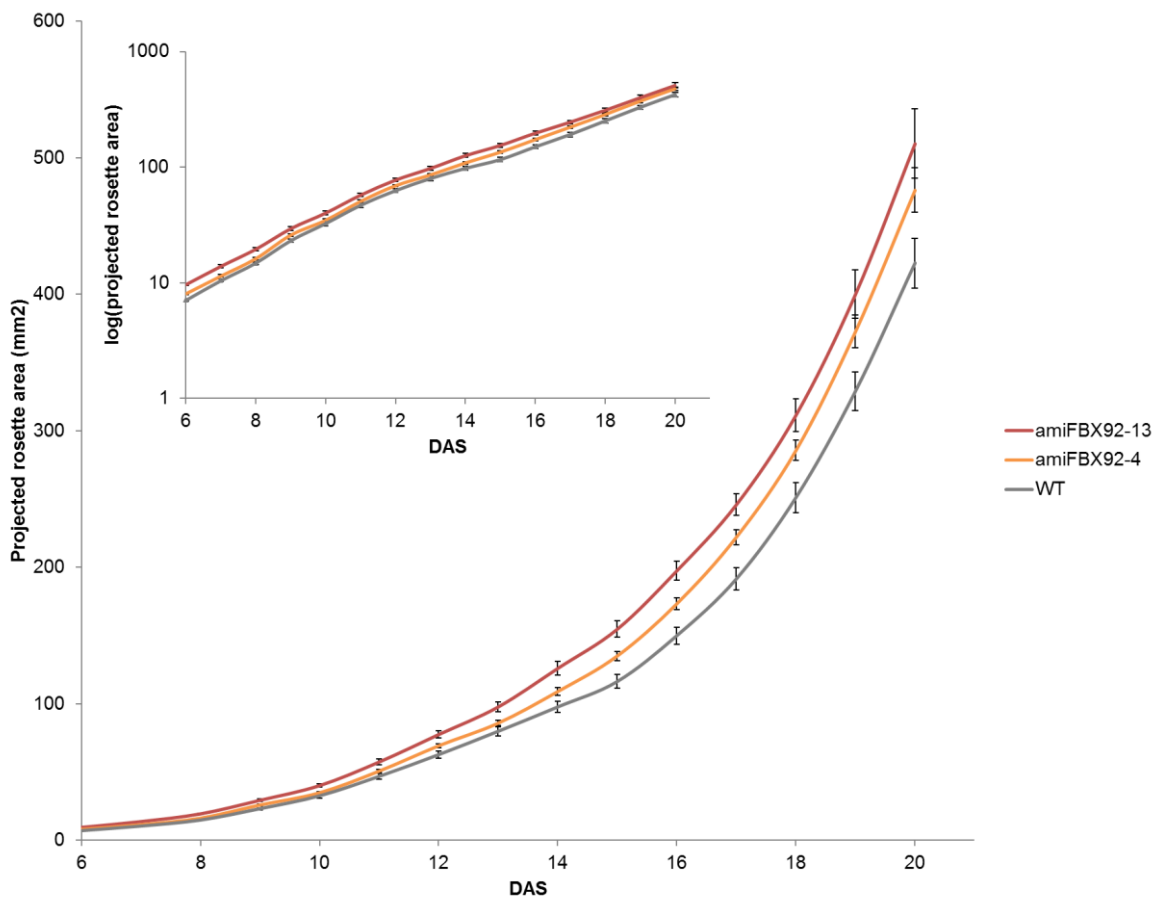

C.

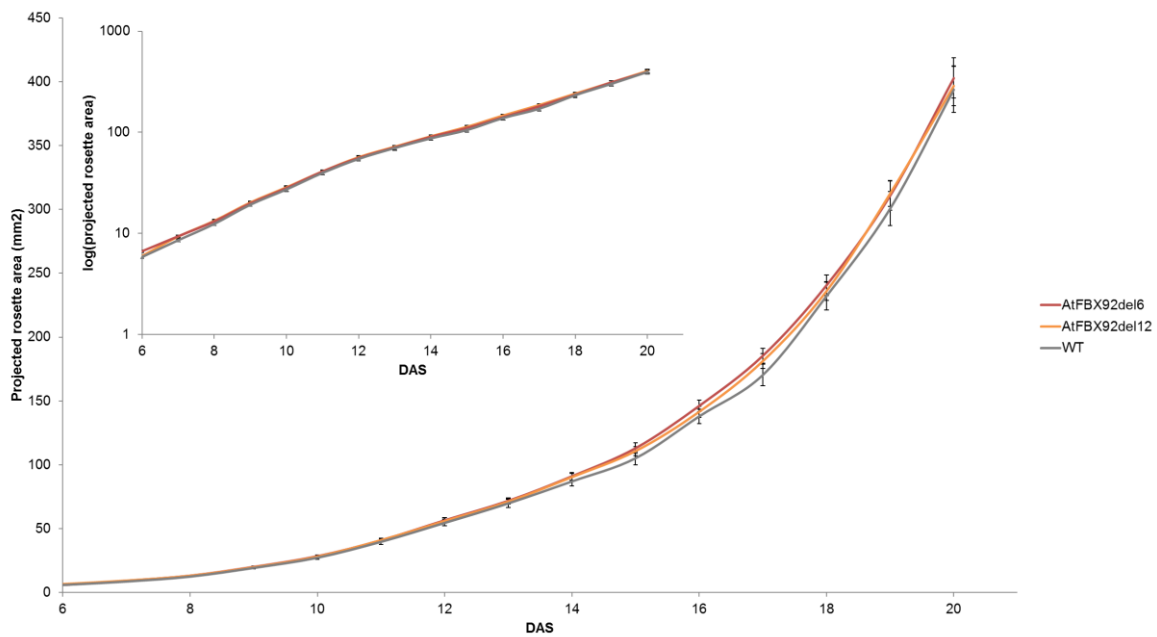

**Supplementary Fig. S8.** Effect of *AtFBX92* perturbation on rosette growth under mild drought conditions in soil. (A) PRA of *AtFBX92<sup>OE</sup>* and WT plants grown in soil from 6 until 20 DAS. Plants were grown under mild drought conditions from 10 DAS onwards. Inset: PRA in log scale. Values represent the mean  $\pm$  SE ( $n = 16$ ). (B) PRA of *amiFBX92* and WT plants grown in soil from 6 until 20 DAS. Plants were grown under mild drought conditions from 10 DAS onwards. Inset: PRA in log scale. Values represent the mean  $\pm$  SE ( $n = 16$ ). (C) PRA of *AtFBX92<sup>del</sup>* and WT plants grown in soil from 6 until 20 DAS. Plants were grown under mild drought conditions from 10 DAS onwards. Inset: PRA in log scale. Values represent the mean  $\pm$  SE ( $n = 16$ ).

**A.**

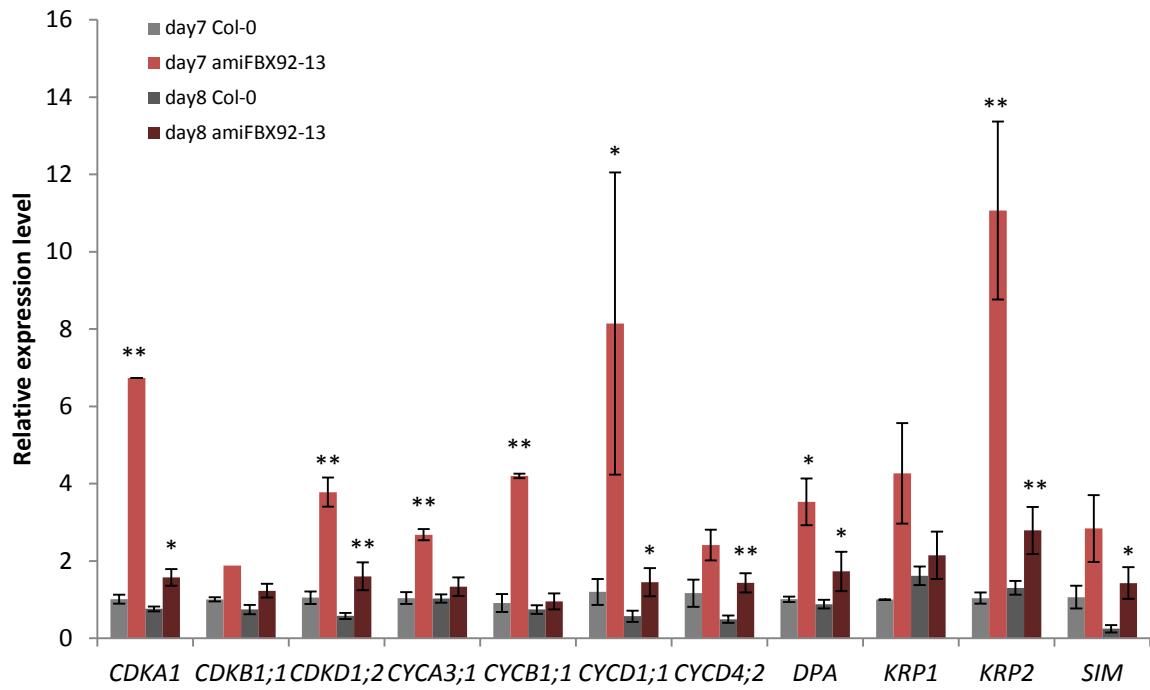

**B.**

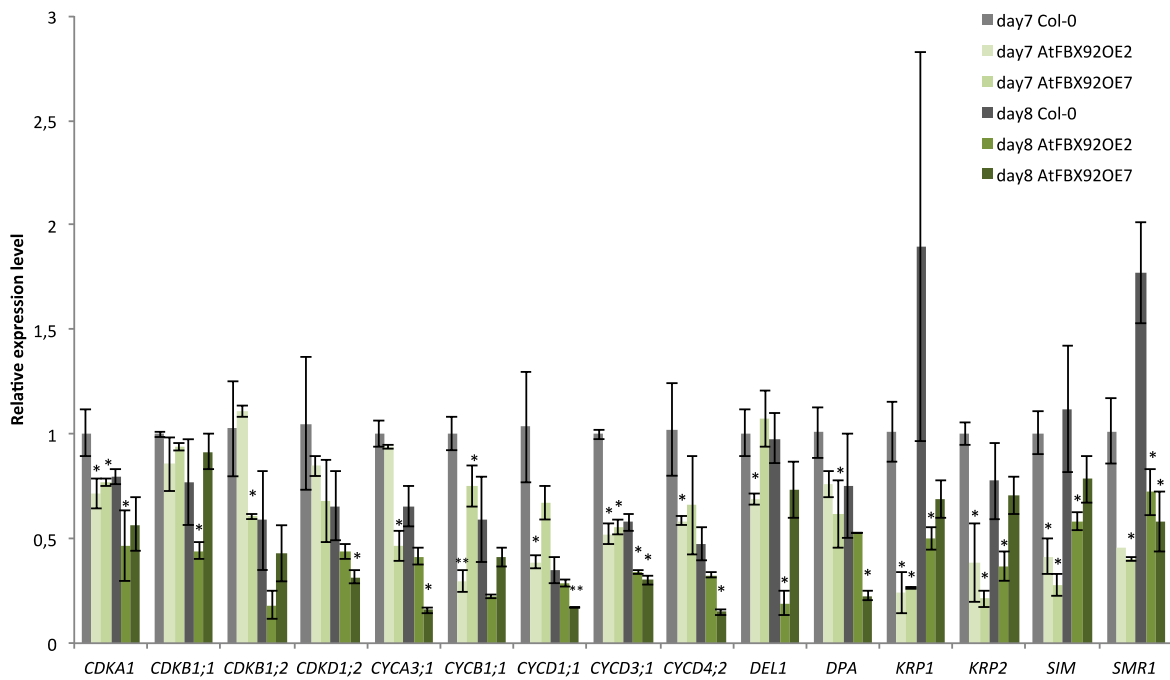

C.

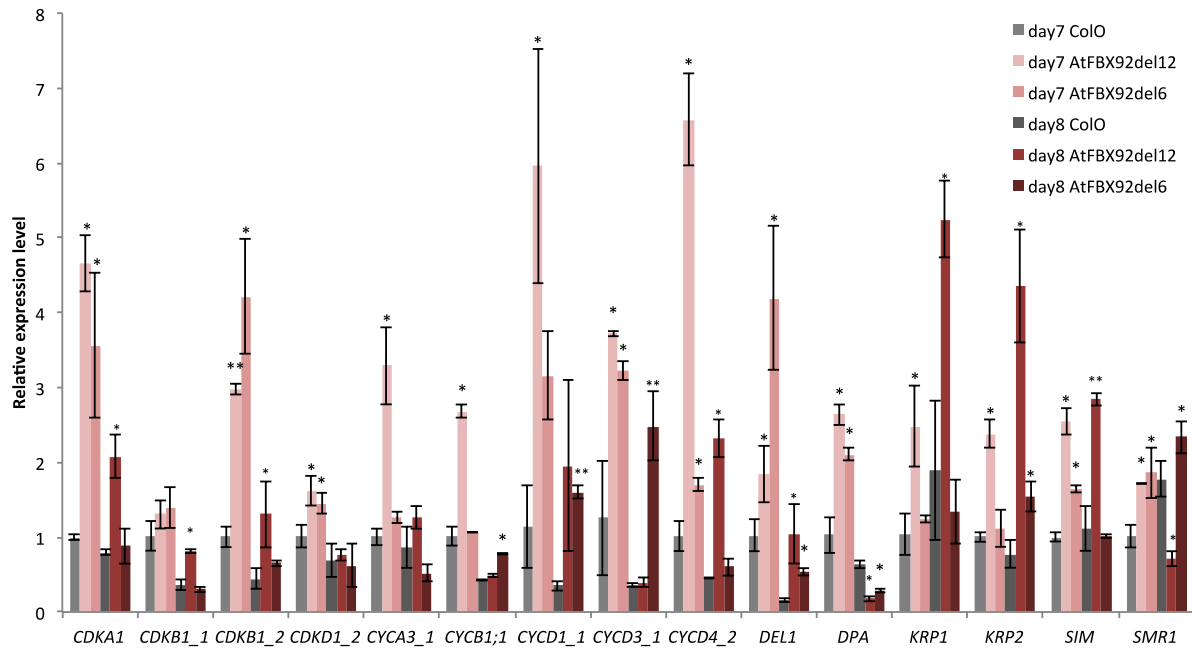

**Supplementary Fig. S9.** Relative expression levels of cell cycle genes in the first leaf pair of *amiFBX92-13* (A), *AtFBX92<sup>OE2</sup>* and *AtFBX92<sup>OE7</sup>* (B) and *AtFBX92<sup>del12</sup>* and *AtFBX92<sup>del6</sup>* (C) compared to WT at 7 and 8 DAS as determined by qRT-PCR. Values were normalized against the expression level of the housekeeping gene and represent mean expression levels of indicated transcripts of three technical repeats  $\pm$  SE. Significant differences (Student's *t*-test): \*,  $P < 0.10$ ; \*\*,  $P < 0.01$  relative to WT.

**Supplementary Table S1.** Primer Sequences.

| <b>Construct</b>             | <b>Application</b> | <b>Forward primer</b>                        | <b>Reverse primer</b>                        |
|------------------------------|--------------------|----------------------------------------------|----------------------------------------------|
| <i>ZmFBX92<sup>OE</sup></i>  | cloning            | AAAAAGCAGGCTTCATCTCTCCAGATCCG<br>ATC         | GAAAGCTGGGTCCCCTGTTTCATCTGAAACAG             |
| <i>ZmFBX92</i>               | qRT-PCR            | GATGCCGATGATGTTGTG                           | CTGTTGCTGGAAGGACTC                           |
| 18S rRNA                     | qRT-PCR            | ACCTTACCAGCCCTTGACATATG                      | GACTTGACCAAACATCTCACGAC                      |
| <i>AtFBX92<sup>OE</sup></i>  | cloning            | AAAAAGCAGGCTATGGCTTCAGAG                     | GAAAGCTGGGTCTGAAGATGTACCC                    |
| <i>AtFBX92<sup>del</sup></i> | cloning            | AAAAAGCAGGCTATGGCTTCAGAG                     | GAAAGCTGGGTCTTAGACAAGTTCTTGGTCCG             |
| <i>amiFBX92</i>              | cloning            | gaTACTAGTCTATGGTTGGGCCGtctctcttttg<br>tattcc | gaCGGCCCAACCATAGACTAGTAtcaaagagaatc<br>aatga |
| <i>amiFBX92</i>              | cloning            | gaCGACCCAACCATACACTAGTTtcacaggtcg<br>tgatatg | gaAACTAGTGTATGGTTGGGTCgtctacatatatt<br>cct   |
| <i>pAtFBX92</i>              | cloning            | AAAAAGCAGGCTAAAATGTCTTGACAGCTG               | GAAAGCTGGGTCTAGCTCCTCGAATGAAGAG<br>AATCAGAAG |
| <i>AtFBX92</i>               | qRT-PCR            | GCGCGGTCGTTTATGGTAAC                         | GCTTTAGCCCTTTGGCAAG                          |
| <i>AtFBX92<sup>del</sup></i> | qRT-PCR            | GCAACGGTCTTCACTTCCTC                         | TGGTCGTGGTACTTGTGGA                          |
| <i>CDKA1</i>                 | qRT-PCR            | TGATCAGCCAAAAGCCCTTA                         | ACGGAGTTCCTGATTCTG                           |
| <i>ACTIN1</i>                | qRT-PCR            | GTTGACTACGAGCAGGAGATGG                       | ACAAACGAGGGCTGGAACAAG                        |
| <i>CDKB1;1</i>               | qRT-PCR            | GCATTGCTTCATATCTTCAGGTT                      | CAGTCACGCAGTGTGGAAC                          |
| <i>CDKB1;2</i>               | qRT-PCR            | CCAATGAAGAAGTATACCCATGAG                     | AATGGGTGGCACCAAGAAG                          |
| <i>CDKD1;2</i>               | qRT-PCR            | CAGATTCCAGCTTCAAAGG                          | TGAATCCTTCAGGACCCATC                         |
| <i>CYCA3;1</i>               | qRT-PCR            | GCCGACGAAAAAGAGAAGT                          | CTTTGTCTATTGCCGTTCC                          |
| <i>CYCB1;1</i>               | qRT-PCR            | GCTTCTGCAATCTACGCAGC                         | CCAACAGCTTTGCACAGTCC                         |
| <i>CYCD1;1</i>               | qRT-PCR            | GCGAACGAGTTACCTTCTCTATCC                     | GCTCAATCCGTACACCAAGTC                        |
| <i>CYCD3;1</i>               | qRT-PCR            | CGAAGAATTCGTGAGGCTCT                         | ACTTCCACAACCGGCATATC                         |
| <i>CYCFBX92;2</i>            | qRT-PCR            | CCTAGTGGAAGCTTGACTG                          | TTAGCCTCAAACACGAACATGG                       |
| <i>DEL1</i>                  | qRT-PCR            | TGATGACGCTGCAAAATTAAGT                       | CATAAAGCCGCTCACTTTAGTT                       |
| <i>DPA</i>                   | qRT-PCR            | GCAAGAACAGAAGCAAGAACAGAAC                    | CGGTCAGCAGTATCAATGGATC                       |
| <i>KRP1</i>                  | qRT-PCR            | GTGGAAGCAATGAATATAAGAAGAAA                   | CGACGTTTCAGTGTACCAT                          |
| <i>KRP2</i>                  | qRT-PCR            | CGTGGATTTACGATGATTTGAA                       | GCGGCGAGACTCTACATCTT                         |
| <i>SIM</i>                   | qRT-PCR            | CCCACTTCTCCGACCACAA                          | GCCGAGAGACGACGGTGT                           |
| <i>SMR1</i>                  | qRT-PCR            | GCTACGCCGGCTCTGATG                           | CGGAGGAGAAGAAACGGTCA                         |
